# Supplementary material
Source: PubMed Central journal article supplement (PMC5833616)
Supplement: jamasurg-153-37-s001.pdf [file jamasurg-153-37-s001.pdf]

## Supplementary Online Content

Scully RE, Schoenfeld AJ, Jiang W, et al. Defining optimal length of opioid pain medication prescription after common surgical procedures. *JAMA Surg*.

Published online September 27, 2017. doi:10.1001/jamasurg.2017.3132

### **eAppendix.** ICD-9 and Current Procedural Terminology Codes

This supplementary material has been provided by the authors to give readers additional information about their work.

## **eAppendix. ICD-9 and Current Procedural Terminology Codes**

### **Appendectomy**

#### CPT code

- 44950 – open appendectomy
- 44955 – incidental appendectomy
- 44960 – for perforated appendicitis
- 44970 – laparoscopic appendectomy
- 44870 – appendectomy for ruptured appendix

#### ICD-9 code

- 47.0 appendectomy
- 47.01 laparoscopic appendectomy
- 47.09 other appendectomy
- 47.1 incidental appendectomy
- 47.11 laparoscopic incidental appendectomy
- 47.19 other incidental appendectomy

### **Cholecystectomy**

#### CPT code

- 47562 laparoscopic cholecystectomy
- 47563 laparoscopic cholecystectomy with cholangiography
- 47564 cholecystectomy with exploration of common duct
- 47579 unlisted laparoscopic procedure, biliary tract
- 47600 open cholecystectomy
- 47605 open cholecystectomy with cholangiography
- 47610 open cholecystectomy with common bile duct exploration

#### ICD-9 code

- 51.21 other partial cholecystectomy
- 51.22 open cholecystectomy
- 51.23 laparoscopic cholecystectomy
- 51.24 laparoscopic partial cholecystectomy

### **Hysterectomy**

#### CPT code

- 58150 total abdominal hysterectomy
- 58180 supracervical abdominal hysterectomy
- 58275 vaginal hysterectomy
- 58290 vaginal hysterectomy for uterus > 250 g
- 58291 with removal of tubes and ovaries
- 58292 with removal tubes and ovaries, with repair of enterocele
- 58293 with pexy
- 58294 with repair of enterocele
- 58541 laparoscopy, supracervical hysterectomy uterus < 250g
- 58542 with removal of tubes and or ovaries

58543 laparoscopy, supracervical hysterectomy uterus > 250g  
58544 with removal of tubes and ovaries  
58545 laparoscopy, surgical, myomectomy 1-4 myomas  
58546 5+ myomas  
58550 laparoscopy, vaginal hysterectomy uterus < 250g  
58552 with removal of tubes and ovaries  
58553 laparoscopy, vaginal hysterectomy uterus > 250g  
58554 with removal of tubes and ovaries  
58570 laparoscopy, total hysterectomy uterus < 250g  
58571 with removal of tubes and ovaries  
58572 laparoscopy, vaginal hysterectomy uterus > 250g  
58573 with removal of tubes and ovaries  
58578 unlisted laparoscopic procedure, uterus

*ICD-9 code*

68.4 total abdominal hysterectomy  
68.5 vaginal hysterectomy  
68.51 laparoscopic assisted vaginal hysterectomy

**Inguinal hernia repair**

*CPT code*

49495 - Repair initial inguinal hernia, under age 6 months, with or without hydrocelectomy; reducible  
49496 - incarcerated or strangulated  
49500 - Repair initial inguinal hernia, age 6 months to under 5 years, with or without hydrocelectomy; reducible  
49501 - incarcerated or strangulated  
49505 - Repair initial inguinal hernia, age 5 years or over; reducible  
49507 - incarcerated or strangulated  
49520 - Repair recurrent inguinal hernia, any age; reducible  
49521 - incarcerated or strangulated  
49525 - Repair inguinal hernia; sliding, any age  
49650 - Laparoscopy, surgical; repair initial inguinal hernia  
49651 - Laparoscopy, surgical; repair recurrent inguinal hernia

*ICD-9 code*

17.11 - Laparoscopic repair of direct inguinal hernia with graft or prosthesis  
17.12 - Laparoscopic repair of indirect inguinal hernia with graft or prosthesis  
17.13 - Laparoscopic repair of inguinal hernia with graft or prosthesis, not otherwise specified  
17.21 - Laparoscopic bilateral repair of direct inguinal hernia with graft or prosthesis  
17.22 - Laparoscopic bilateral repair of indirect inguinal hernia with graft or prosthesis  
17.23 - Laparoscopic bilateral repair of inguinal hernia, one direct and one indirect, with graft or prosthesis  
17.24 - Laparoscopic bilateral repair of inguinal hernia with graft or prosthesis, not otherwise specified

53.00 - Unilateral repair of inguinal hernia, not otherwise specified  
53.01 - Other and open repair of direct inguinal hernia  
53.02 - Other and open repair of indirect inguinal hernia  
53.03 - Other and open repair of direct inguinal hernia with graft or prosthesis  
53.04 - Other and open repair of indirect inguinal hernia with graft or prosthesis  
53.05 - Unilateral repair of inguinal hernia with graft or prosthesis, not otherwise specified  
53.10 - Bilateral repair of inguinal hernia, not otherwise specified  
53.11 - Other and open bilateral repair of direct inguinal hernia  
53.12 - Other and open bilateral repair of indirect inguinal hernia  
53.13 - Other and open bilateral repair of inguinal hernia, one direct and one indirect  
53.14 - Other and open bilateral repair of direct inguinal hernia with graft or prosthesis  
53.15 - Other and open bilateral repair of indirect inguinal hernia with graft or prosthesis  
51.16 - Other and open bilateral repair of inguinal hernia, one direct and one indirect, with graft or prosthesis  
53.17 - Bilateral repair of inguinal hernia, one direct and one indirect, not otherwise specified

### **Rotator cuff repair**

CPT code

23410 – Repair of ruptured musculotendinous cuff (eg, rotator cuff) open; acute  
23412 - Repair of ruptured musculotendinous cuff (eg, rotator cuff) open; chronic  
23420 - Reconstruction of complete shoulder (rotator) cuff avulsion, chronic (includes acromioplasty)  
29287 - Arthroscopy, shoulder, surgical; with rotator cuff repair

ICD-9 code

81.82 – repair of recurrent dislocation of shoulder  
83.63 - rotator cuff repair

### **Mastectomy**

CPT Code

19303 – Mastectomy, simple, complete  
19304 – Mastectomy, subcutaneous  
19307 – Mastectomy, modified radical

ICD-9 code

85 Operations on the breast  
85.41 Unilateral simple mastectomy  
85.42 Bilateral simple mastectomy  
85.43 Unilateral extended simple mastectomy  
85.44 Bilateral extended simple mastectomy

### **Rotator Cuff Repair**

#### **CPT Code**

- 23410 - Repair of ruptured musculotendinous cuff (eg, rotator cuff) open; acute
- 23412 - Repair of ruptured musculotendinous cuff (eg, rotator cuff) open; chronic
- 23420 - Reconstruction of complete shoulder (rotator) cuff avulsion, chronic (includes acromioplasty)
- 29827 - Arthroscopy, shoulder, surgical; with rotator cuff repair

#### **ICD-9 code**

- 81.82 - Repair of recurrent dislocation of shoulder
- 83.63 - Rotator cuff repair

### **Discectomy**

#### **ICD-9 code**

- 80.50 - Discectomy
- 80.51 - Insertion of interbody spinal fusion device
- 80.59 - Other destruction of intervertebral disc

### **ACL Repair**

#### **CPT Code**

- 29888 – Arthroscopically aided anterior cruciate ligament repair/augmentation or reconstruction

#### **ICD-9 code**

- 81.45 - Cruciate ligament repair
- 81.47 - Other repair knee
